# Supplementary material for: Investigation of the Binding Affinity of a Broad Array of l-Fucosides with Six Fucose-Specific Lectins of Bacterial and Fungal Origin
Source: Molecules. 2019 Jun 18;24(12):2262. doi: 10.3390/molecules24122262 (PMC6631993; doi:10.3390/molecules24122262)
Supplement: Supplementary file 1 [file molecules-24-02262-s001.pdf]

# Investigation of the Binding Affinity of a Broad Array of L-Fucosides with Six Fucose-Specific Lectins of Bacterial and Fungal Origin

Son Thai Le<sup>1,§</sup>, Lenka Malinovska<sup>2,3,§</sup>, Michaela Vašková<sup>4</sup>, Erika Mező<sup>1</sup>, Viktor Kelemen<sup>1</sup>, Anikó Borbás<sup>1</sup>, Petr Hodek<sup>4</sup>, Michaela Wimmerová<sup>2,3,5\*</sup> and Magdolna Csávas<sup>1\*</sup>

<sup>1</sup> Department of Pharmaceutical Chemistry, University of Debrecen, Egyetem tér 1, H-4032, Debrecen, Hungary; [le.thai.son@pharm.unideb.hu](mailto:le.thai.son@pharm.unideb.hu) (S. T. L.), [mezo.erika@science.unideb.hu](mailto:mezo.erika@science.unideb.hu) (E.M.), [kelemen.viktor@pharm.unideb.hu](mailto:kelemen.viktor@pharm.unideb.hu) (V.K.), [borbas.aniko@pharm.unideb.hu](mailto:borbas.aniko@pharm.unideb.hu) (A.B.), [csavas.magdolna@science.unideb.hu](mailto:csavas.magdolna@science.unideb.hu) (M.Cs.)

<sup>2</sup> Central European Institute of Technology, Masaryk University, Kamenice 5, 625 00 Brno, Czech Republic; [malinovska@mail.muni.cz](mailto:malinovska@mail.muni.cz) (L.M.), [michaela.wimmerova@ceitec.muni.cz](mailto:michaela.wimmerova@ceitec.muni.cz) (M.W.)

<sup>3</sup> National Centre for Biomolecular Research, Faculty of Science, Masaryk University, Kotlářská 2, 611 37 Brno, Czech Republic

<sup>4</sup> Department of Biochemistry, Faculty of Science, Charles University, Albertov 2030, 128 40 Prague 2, Czech Republic, [michael.vaskova@gmail.com](mailto:michael.vaskova@gmail.com) (M.V.), [petr.hodek@natur.cuni.cz](mailto:petr.hodek@natur.cuni.cz) (P.H.)

<sup>5</sup> Department of Biochemistry, Faculty of Science, Masaryk University, Kotlářská 2, 611 37 Brno, Czech Republic

\*Correspondence: [michaw@chemi.muni.cz](mailto:michaw@chemi.muni.cz) (M.W.); [csavas.magdolna@science.unideb.hu](mailto:csavas.magdolna@science.unideb.hu) (M.Cs.)

§These two authors contributed equally.

Received: date; Accepted: date; Published: date

**Abstract:** Series of multivalent  $\alpha$ -L-fucoside containing glycoclusters and variously decorated L-fucosides were synthesized to find potential inhibitors of fucose-specific lectins and study the structure-binding affinity relationships. Tri- and tetravalent fucoclusters were built up using copper-mediated azide-alkyne click chemistry. Series of fucoside monomers and dimers were synthesized using various methods, namely glycosylation, azide-alkyne click reaction, photoinduced thiol-en addition and sulfation. The interactions of compounds with six fucoselectins of bacterial or fungal origin were tested using hemagglutination inhibition assay. As a result, a tetravalent,  $\alpha$ -L-fucose presenting glycocluster showed to be orders of magnitude better ligand than a simple monosaccharide for tested lectins in most cases, which can nominate it as a universal ligand for studied lectins. This compound was also able to inhibit adhesion of *Pseudomonas aeruginosa* cells to human epithelial bronchial cells. A trivalent fucocluster with protected amine functional group seems also to be a promising candidate to design glycoconjugates and chimeras.

**Keywords:** L-fucosides, multivalency, lectins, glycoclusters, hemagglutination, cystic fibrosis.

| Inhibition of hemagglutination - AFL |                                                           |                                                        |               |               |
|--------------------------------------|-----------------------------------------------------------|--------------------------------------------------------|---------------|---------------|
| L-fucose*                            | 50 mM                                                     | 25 mM                                                  | 12.5 mM       | 6.25 mM       |
| Compound 1                           | 0.391 mM                                                  | 0.195 mM                                               | 97.66 $\mu$ M | 48.83 $\mu$ M |
| Compound 2                           | 0.391 mM                                                  | 0.195 mM                                               | 97.66 $\mu$ M | 48.83 $\mu$ M |
| Compound 3                           | 1.5625 mM                                                 | 0.781 mM                                               | 0.391 mM      | 0.195 mM      |
| Compound 4                           | 1.5625 mM                                                 | 0.781 mM                                               | 0.391 mM      | 0.195 mM      |
| Controls**                           | Positive control<br>(experiment without<br>any inhibitor) | Negative control<br>(experiment without<br>lectin AFL) |               |               |
| L-fucose*                            | 50 mM                                                     | 25 mM                                                  | 12.5 mM       | 6.25 mM       |
| Compound 5                           | 0.781 mM                                                  | 0.391 mM                                               | 0.195 mM      | 97.66 $\mu$ M |
| Controls**                           | Positive control<br>(experiment without<br>any inhibitor) | Negative control<br>(experiment without<br>lectin AFL) |               |               |

\* Standard. Standard experiment was done anew for every used batch of lectin or red blood cells.

\*\* Controls were done anew for every used batch of lectin or red blood cells.

S1. Influence of L-fucose, compounds 1, 2, 3, 4 and 5 on hemagglutination caused by lectin AFL.

| Inhibition of hemagglutination - RSL |                                                           |                                                        |               |              |
|--------------------------------------|-----------------------------------------------------------|--------------------------------------------------------|---------------|--------------|
| L-fucose*                            | 6.25 mM                                                   | 3.125 mM                                               | 1.5625 mM     | 0.781 mM     |
| Compound 1                           | 12.2 $\mu$ M                                              | 6.1 $\mu$ M                                            | 3 $\mu$ M     | 1.5 $\mu$ M  |
| Compound 2                           | 12.2 $\mu$ M                                              | 6.1 $\mu$ M                                            | 3 $\mu$ M     | 1.5 $\mu$ M  |
| Compound 3                           | 12.2 $\mu$ M                                              | 6.1 $\mu$ M                                            | 3 $\mu$ M     | 1.5 $\mu$ M  |
| Compound 4                           | 12.2 $\mu$ M                                              | 6.1 $\mu$ M                                            | 3 $\mu$ M     | 1.5 $\mu$ M  |
| Compound 14                          | 97.66 $\mu$ M                                             | 48.83 $\mu$ M                                          | 22.41 $\mu$ M | 12.2 $\mu$ M |
| Controls**                           | Positive control<br>(experiment without<br>any inhibitor) | Negative control<br>(experiment without<br>lectin RSL) |               |              |
| L-fucose*                            | 1.5625 mM                                                 | 0.781 mM                                               | 0.391 mM      | 0.195 mM     |
| Compound 5                           | 24.41 $\mu$ M                                             | 12.2 $\mu$ M                                           | 6.1 $\mu$ M   | 3 $\mu$ M    |
| Controls**                           | Positive control<br>(experiment without<br>any inhibitor) | Negative control<br>(experiment without<br>lectin RSL) |               |              |

\* Standard. Standard experiment was done anew for every used batch of protein or red blood cells.

\*\* Controls were done anew for every used batch of protein or red blood cells.

S2. Influence of L-fucose, compounds 1, 2, 3, 4, 14 and 5 on hemagglutination caused by lectin RSL.

| Inhibition of hemagglutination - AAL |                                                           |                                                        |               |               |
|--------------------------------------|-----------------------------------------------------------|--------------------------------------------------------|---------------|---------------|
| L-fucose*                            | 50 mM                                                     | 25 mM                                                  | 12.5 mM       | 6.25 mM       |
| Compound 1                           | 1.5625 mM                                                 | 0.781 mM                                               | 0.391 mM      | 0.195 mM      |
| Compound 2                           | 0.391 mM                                                  | 0.195 mM                                               | 97.66 $\mu$ M | 48.83 $\mu$ M |
| Compound 3                           | 1.5625 mM                                                 | 0.781 mM                                               | 0.391 mM      | 0.195 mM      |
| Compound 4                           | 1.5625 mM                                                 | 0.781 mM                                               | 0.391 mM      | 0.195 mM      |
| Controls**                           | Positive control<br>(experiment without<br>any inhibitor) | Negative control<br>(experiment without<br>lectin AAL) |               |               |
| L-fucose*                            | 50 mM                                                     | 25 mM                                                  | 12.5 mM       | 6.25 mM       |
| Compound 5                           | 0.781 mM                                                  | 0.391 mM                                               | 0.195 mM      | 97.66 $\mu$ M |
| Controls**                           | Positive control<br>(experiment without<br>any inhibitor) | Negative control<br>(experiment without<br>lectin AAL) |               |               |

\* Standard. Standard experiment was done anew for every used batch of protein or red blood cells.

\*\* Controls were done anew for every used batch of protein or red blood cells.

S3. Influence of L-fucose, compounds 1, 2, 3, 4 and 5 on hemagglutination caused by lectin AAL.

| Inhibition of hemagglutination - AOL |                                                           |                                                        |               |               |
|--------------------------------------|-----------------------------------------------------------|--------------------------------------------------------|---------------|---------------|
| L-fucose*                            | 25 mM                                                     | 12.5 mM                                                | 6.25 mM       | 3.125 mM      |
| Compound 1                           | 0.391 mM                                                  | 0.195 mM                                               | 97.66 $\mu$ M | 48.83 $\mu$ M |
| Compound 2                           | 97.66 $\mu$ M                                             | 48.83 $\mu$ M                                          | 24.41 $\mu$ M | 12.2 $\mu$ M  |
| Compound 3                           | 3.125 mM                                                  | 1.5625 mM                                              | 0.781 mM      | 0.391 mM      |
| Compound 4                           | 3.125 mM                                                  | 1.5625 mM                                              | 0.781 mM      | 0.391 mM      |
| Controls**                           | Positive control<br>(experiment without<br>any inhibitor) | Negative control<br>(experiment without<br>lectin AOL) |               |               |
| L-fucose*                            | 25 mM                                                     | 12.5 mM                                                | 6.25 mM       | 3.125 mM      |
| Compound 5                           | 0.195 mM                                                  | 97.66 $\mu$ M                                          | 48.83 $\mu$ M | 24.41 $\mu$ M |
| Controls**                           | Positive control<br>(experiment without<br>any inhibitor) | Negative control<br>(experiment without<br>lectin AOL) |               |               |

\* Standard. Standard experiment was done anew for every used batch of protein or red blood cells.

\*\* Controls were done anew for every used batch of protein or red blood cells.

S4. Influence of L-fucose, compounds 1, 2, 3, 4 and 5 on hemagglutination caused by lectin AOL.

| Inhibition of hemagglutination – BC2L-C |                                                           |           |                                                           |          |
|-----------------------------------------|-----------------------------------------------------------|-----------|-----------------------------------------------------------|----------|
| L-fucose*                               | 50 mM                                                     | 25 mM     | 12.5 mM                                                   | 6.25 mM  |
| Compound 1                              | 6.25 mM                                                   | 3.125 mM  | 1.5625 mM                                                 | 0.781 mM |
| Compound 2                              | 3.125 mM                                                  | 1.5625 mM | 0.781 mM                                                  | 0.391 mM |
| Controls**                              | Positive control<br>(experiment without<br>any inhibitor) |           | Negative control<br>(experiment without<br>lectin BC2L-C) |          |
| L-fucose*                               | 50 mM                                                     | 25 mM     | 12.5 mM                                                   | 6.25 mM  |
| Compound 3                              | 6.25 mM                                                   | 3.125 mM  | 1.5625 mM                                                 | 0.781 mM |
| Compound 4                              | 3.125 mM                                                  | 1.5625 mM | 0.781 mM                                                  | 0.391 mM |
| Controls**                              | Positive control<br>(experiment without<br>any inhibitor) |           | Negative control<br>(experiment without<br>lectin BC2L-C) |          |
| L-fucose*                               | 50 mM                                                     | 25 mM     | 12.5 mM                                                   | 6.25 mM  |
| Compound 5                              | 3.125 mM                                                  | 1.5625 mM | 0.781 mM                                                  | 0.391 mM |
| Controls**                              | Positive control<br>(experiment without<br>any inhibitor) |           | Negative control<br>(experiment without<br>lectin BC2L-C) |          |

\* Standard. Standard experiment was done anew for every used batch of protein or red blood cells.

\*\* Controls were done anew for every used batch of protein or red blood cells.

S5. Influence of L-fucose, compounds 1, 2, 3, 4 and 5 on hemagglutination caused by lectin BC2L-C.
